# Supplementary material for: Prevalence and Clinical Significance of Intraventricular Conduction Disturbances in Hospitalized Children
Source: MDPI journal article supplement (doi:10.3390/jcdd11040129), 2024-04-22
Supplement: s1 [file s1]

**Table S1.** Prevalence and diagnostic accuracy of Incomplete right bundle branch block in paediatric heart disease.

|                                                                    | Sensitivity      | Specificity      | PPV              | NPV              | PA               |
|--------------------------------------------------------------------|------------------|------------------|------------------|------------------|------------------|
| <i>Congenital heart diseases (n=2369)</i>                          | 19.1(17.6-20.8)  | 85.1(83.3-86.9)  | 65.3(62.0-68.4)  | 41.9(41.2-42.6)  | 46.0(44.4-47.5)  |
| Patent foramen ovale (n=109)                                       | 8.3 (3.8-15.1)   | 82.4 (81.1-83.5) | 1.3 (0.7-2.4)    | 96.9 (96.7-97.1) | 80.3 (79.1-81.6) |
| Secundum atrial septal defect (n=847)                              | 26.3 (23.3-29.4) | 85.0 (83.7-86.3) | 32.1 (26.1-35.1) | 81.1 (80.4-81.7) | 72.6 (71.1-73.9) |
| Primum atrial septal defect (n=11)                                 | 81.8 (48.2-97.7) | 82.8 (81.5-83.9) | 1.3 (0.8-1.7)    | 99.9 (99.7-99.9) | 82.8 (81.5-83.9) |
| Atrioventricular septal defect (n=77)                              | 10.4(4.6-19.4)   | 82.4(81.2-83.6)  | 1.1(0.6-2.2)     | 97.9(97.7-98.0)  | 81.0(79.8-82.2)  |
| Ventricular septal defect (n=453)                                  | 12.8(9.9-16.2)   | 82.0(80.7-83.3)  | 8.3(6.6-10.5)    | 88.0(87.6-88.4)  | 74.1(72.8-75.5)  |
| Patent ductus arteriosus (n=534)                                   | 15.3(12.4-18.7)  | 82.3(81.0-83.6)  | 11.8(9.8-14.2)   | 86.3(85.8-86.8)  | 73.3(71.9-74.7)  |
| Aortopulmonary window (n=10)                                       | 20.0(2.5-55.6)   | 82.6(81.4-83.8)  | 0.3(0.1-1.0)     | 99.8(99.7-99.8)  | 82.5(81.2-83.6)  |
| Abnormal origin of coronary artery from inappropriate situs (n=14) | 21.4(4.7-50.8)   | 82.6(81.4-83.8)  | 0.4(0.2-1.2)     | 99.7(99.6-99.7)  | 82.4(81.2-83.6)  |
| Anomalous left coronary artery from the pulmonary artery (n=2)     | -                | -                | -                | -                | -                |
| Anomalies of the aortic arch (n=61)                                | 18.0(9.4-30.0)   | 82.6(81.4-83.8)  | 1.6(0.9-2.7)     | 98.5(98.3-98.6)  | 81.6(80.4-82.8)  |
| Aberrant origin of the subclavian artery (n=9)                     | 22.2(2.8-60.0)   | 82.6(81.4-83.8)  | 0.3(0.1-1.0)     | 99.8(99.7-99.8)  | 82.4(81.3-83.7)  |
| Partially anomalous pulmonary venous connection (n=2)              | -                | -                | -                | -                | -                |
| Totally anomalous pulmonary venous connection (n=19)               | 15.8(3.4-39.6)   | 82.6(81.4-83.8)  | 0.4(0.1-1.2)     | 99.5(99.4-99.6)  | 82.3(81.1-83.5)  |
| Tricuspid valve atresia (n=22)                                     | 4.5(0.1-22.8)    | 82.5(81.3-83.7)  | 0.1(0.0-1.0)     | 99.3(99.3-99.4)  | 82.1(80.9-83.3)  |
| Tricuspid valve dysplasia (n=17)                                   | 5.9(0.1-28.7)    | 82.6(81.3-83.7)  | 0.1(0.0-1.0)     | 99.5(99.4-99.6)  | 82.2(81.0-83.4)  |
| Ebstein anomaly (n=8)                                              | 12.5(0.3-52.6)   | 82.6(81.4-83.8)  | 0.1(0.0-0.9)     | 99.8(99.7-99.8)  | 82.5(81.2-83.6)  |
| Tricuspid stenosis (n=1)                                           | -                | -                | -                | -                | -                |
| Pulmonary stenosis (n=183)                                         | 18.6(13.2-25.0)  | 82.7(81.4-83.9)  | 4.9(3.6-6.6)     | 95.5(95.2-95.8)  | 79.7(78.5-81.0)  |
| Pulmonary valve dysplasia (n=38)                                   | 21.0(9.5-37.3)   | 82.6(81.4-83.8)  | 1.15(0.6-2.1)    | 99.1(98.9-99.2)  | 82.1(80.8-83.2)  |
| Pulmonary atresia and intact ventriculum septum (n=33)             | 24.2(11.1-42.3)  | 82.7(81.5-83.8)  | 1.15(0.6-2.1)    | 99.2(99.1-99.3)  | 82.2(81.0-83.3)  |
| Pulmonary atresia and ventricular septal defect (n=22)             | 22.7(7.8-45.3)   | 82.6(81.4-83.8)  | 0.7(0.3-1.5)     | 99.4(99.3-99.6)  | 82.3(81.1-83.5)  |
| Tetralogy of Fallot (n=157)                                        | 7.0(3.5-12.2)    | 82.2(80.9-83.4)  | 1.6(0.9-2.8)     | 95.6(95.4-95.8)  | 79.2(77.9-80.5)  |
| Truncus arteriosus (n=8)                                           | -                | -                | -                | -                | -                |
| Mitral valve abnormalities (n=53)                                  | 18.9(9.4-32.0)   | 82.6(81.4-83.8)  | 1.4(0.8-2.5)     | 98.7(98.5-98.8)  | 81.8(80.6-83.0)  |
| Bicuspid aortic valve (n=33)                                       | 12.1(3.4-28.2)   | 82.6(81.4-83.7)  | 0.6(0.2-1.4)     | 99.1(99.0-99.2)  | 82.0(80.8-83.1)  |
| Aortic valve stenosis (n=52)                                       | 13.5(5.6-25.8)   | 82.6(81.3-83.7)  | 1.0(0.5-2.0)     | 98.6(80.4-98.8)  | 81.7(80.4-82.9)  |
| Aortic subvalvar stenosis (n=4)                                    | 25.0(0.6-80.6)   | 82.6(81.4-83.8)  | 0.1(0.0-0.7)     | 99.9(99.8-99.9)  | 82.6(81.3-83.7)  |
| Coartaction of the aorta (n=127)                                   | 22.0(15.2-30.2)  | 82.8(81.5-83.9)  | 4.0(2.9-5.5)     | 97.0(96.7-97.2)  | 80.8(79.6-82.0)  |
| Hypoplastic left heart syndrome (n=17)                             | 11.8(1.5-36.4)   | 82.6(81.4-83.8)  | 0.3(0.1-1.0)     | 99.5(99.4-99.6)  | 82.3(81.1-83.5)  |
| Transposition of the great arteries (n=64)                         | 15.6(7.8-26.9)   | 82.6(81.4-83.8)  | 1.4(0.8-2.5)     | 98.3(98.2-98.5)  | 81.5(80.3-82.7)  |

|                                                                  |                 |                 |                 |                  |                  |
|------------------------------------------------------------------|-----------------|-----------------|-----------------|------------------|------------------|
| Congenitally corrected transposition of the great arteries (n=6) | -               | -               | -               | -                | -                |
| Double outlet right ventricle (n=44)                             | 9.0(2.5-21.7)   | 82.5(81.3-83.7) | 0.6(0.2-1.5)    | 98.8(98.7-98.9)  | 81.7(80.5-82.9)  |
| Double inlet left ventricle (n=11)                               | 0.2(0.0-1.3)    | 82.6(82.3-83.8) | 0.1(0-1)        | 88.9(88.8-89)    | 74.9(73.6-76.2)  |
| Cor triatratum (n=3)                                             | -               | -               | -               | -                | -                |
| Abnormalities of atrial situs (n=16)                             | -               | -               | -               | -                | -                |
| <i>Cardiomyopathies (n=65)</i>                                   | 4.6(1.0-12.9)   | 82.4(81.2-83.6) | 0.4(0.1-1.3)    | 98.1(98.0-98.2)  | 81.1(79.9-82.3)  |
| Hypertrophic cardiomyopathy (n=34)                               | 5.9(0.7-19.7)   | 82.5(81.3-83.7) | 0.3(0.1-1.1)    | 99.0(98.9-99.1)  | 81.9(80.6-83)    |
| Dilated cardiomyopathy (n=28)                                    | 3.6(0.1-18.3)   | 82.5(81.3-83.7) | 0.1(0-1.0)      | 99.2(99.1-99.2)  | 82.0(80.7-83.1)  |
| Restrictive cardiomyopathy (n=1)                                 | -               | -               | -               | -                | -                |
| Left ventricular non compaction (n=2)                            | -               | -               | -               | -                | -                |
| <i>Rheumatic heart disease (n=11)</i>                            | 9.1(0.2-41.3)   | 82.6(81.3-83.8) | 0.1(0.0-0.9)    | 99.7(99.6-99.7)  | 82.4(81.2-83.6)  |
| <i>Myocarditis (n=50)</i>                                        | 16.0(7.2-29.1)  | 82.6(81.4-83.8) | 1.1(0.6-2.2)    | 98.7(98.6-98.9)  | 81.8(80.5-82.9)  |
| <i>Pericardial disease (n=71)</i>                                | 19.7(11.2-30.9) | 82.7(81.4-83.8) | 2.0(1.3-3.2)    | 98.3(98.1-98.5)  | 81.5(80.3-82.7)  |
| Acute pericarditis (n=67)                                        | 19.4(10.8-30.9) | 82.6(81.4-83.8) | 1.9(1.1-3.0)    | 98.4(98.2-98.5)  | 81.6(80.4-82.8)  |
| Chronic pericarditis (n=4)                                       | 25.0(0.6-80.6)  | 82.6(81.4-83.8) | 0.1(0.0-0.8)    | 99.9(99.8-99.9)  | 82.6(81.4-83.7)  |
| <i>Kawasaki disease (n=8)</i>                                    | 12.5(0.3-52.6)  | 82.6(81.4-83.8) | 0.1(0.0-0.9)    | 99.8(99.7-99.8)  | 82.5(81.2-83.6)  |
| <i>Pulmonary hypertension (n=25)</i>                             | 12.0(2.5-31.2)  | 82.6(81.4-83.7) | 0.4(0.1-1.2)    | 99.3(99.2-99.4)  | 82.1(80.9-83.32) |
| <i>Cardiac tumours (n=15)</i>                                    | 6.7(0.2-31.9)   | 82.6(81.3-83.7) | 0.12(0.0-0.9)   | 99.6(99.5-99.6)  | 82.3(81.1-83.5)  |
| Rhabdomyomas (n=15)                                              | 6.7(0.2-31.9)   | 82.98(1.3-83.7) | 0.12(0.0-0.9)   | 99.6(99.5-99.6)  | 82.3(81.1-83.5)  |
| <i>Disorder of the cardiac rhythm (n=712)</i>                    | 12.8(10.4-15.5) | 81.6(80.2-82.9) | 13.1(10.9-15.6) | 81.2(80.7-81.7)  | 69.3(69.9-70.8)  |
| Frequent supraventricular premature complexes (n=48)             | 8.3(2.3-20)     | 82.5(81.3-83.7) | 0.6(0.2-1.5)    | 98.7(98.5-97.8)  | 81.6(80.4-82.8)  |
| Frequent ventricular premature complexes (n=78)                  | 12.8(6.3-22.3)  | 82.5(81.3-83.7) | 1.4(0.82.5)     | 97.9(97.7-98.1)  | 81.1(79.9-82.4)  |
| Ventricular pre-excitation (n=130)                               | 10.0(5.4-16.5)  | 82.4(81.1-83.6) | 1.9(1.1-3.1)    | 96.4(96.2-96.6)  | 80.0(78.7-81.2)  |
| Atrial ectopic tachycardia (n=130)                               | 10.0(5.4-16.5)  | 82.4(81.1-83.6) | 1.9(1.1-3.1)    | 96.4(96.2-96.6)  | 80.0(78.7-81.2)  |
| Atrioventricular reentry tachycardia (n=237)                     | 12.2(8.3-17.1)  | 82.3(81.0-83.5) | 4.2(3-5.8)      | 93.7(93.4-94.0)  | 78.1(76.8-79.4)  |
| Atrioventricular node reentry tachycardia (n=134)                | 19.4(13.1-27.1) | 81.3(80.1-82.6) | 3.5(2.5-4.9)    | 96.7(96.4-96.9)  | 79.3(78.0-80.5)  |
| Atrial flutter (n=15)                                            | 6.7(0.2-31.9)   | 82.6(81.4-83.7) | 0.1(0.0-0.9)    | 99.6(99.5-99.6)  | 82.3(81.1-83.5)  |
| Atrial fibrillation (n=4)                                        | -               | -               | -               | -                | -                |
| Ventricular tachycardia (n=7)                                    | 28.6(3.7-71.0)  | 82.6(81.4-83.8) | 0.3(0.1-0.9)    | 99.85(99.8-99.9) | 82.5(81.3-83.7)  |
| <i>Cardiac channelopathies (n=47)</i>                            | 19.1(9.1-33.3)  | 82.6(81.4-83.8) | 1.3(0.7-2.3)    | 98.8(98.7-99.0)  | 81.9(80.7-83.1)  |
| Long QT syndrome (n=27)                                          | 14.8(4.2-33.8)  | 82.6(81.4-83.8) | 0.6(0.2-1.4)    | 99.3(99.2-99.4)  | 82.1(80.9-83.3)  |
| Brugada syndrome (n=20)                                          | 25.0(8.7-49.1)  | 82.7(81.4-83.8) | 0.7(0.3-1.5)    | 99.5(99.4-99.6)  | 82.4(81.1-83.5)  |
| <i>No morpho-functional abnormalities (n=620)</i>                | 20.5(17.4-23.9) | 67.7(65.4-69.9) | 18.3(15.9-21.0) | 70.6(69.6-71.7)  | 53.3(53.3-57.4)  |

**Table S2.** Prevalence and diagnostic accuracy of complete right bundle branch block in paediatric heart disease.

|                                                                    | Sensitivity      | Specificity     | PPV             | NPV              | PA               |
|--------------------------------------------------------------------|------------------|-----------------|-----------------|------------------|------------------|
| <i>Congenital heart diseases (n=2369)</i>                          | 6.2(5.3-7.3)     | 97.3(96.4-98.1) | 77.4(71.1-82.8) | 41.6(41.2-41.9)  | 43.3(41.8-44.8)  |
| Patent foramen ovale (n=109)                                       | 4.6(1.1-10.4)    | 95.2(94.4-95.9) | 2.6(1.1-6.0)    | 97.2(97.1-97.4)  | 92.7(91.9-93.5)  |
| Secundum atrial septal defect (n=847)                              | 5.0(3.7-6.8)     | 93.9(92.9-94.9) | 22.5(17.3-28.8) | 74.1(73.7-74.4)  | 71.1(69.5-72.6)  |
| Primum atrial septal defect (n=11)                                 | 18.2(2.3-51.8)   | 95.2(94.5-95.9) | 1.0(0.3-3.6)    | 99.8(99.7-99.8)  | 95.0(94.3-95.7)  |
| Atrioventricular septal defect (n=77)                              | 9.1(3.7-17.8)    | 95.3(94.6-95.9) | 3.7(1.8-7.2)    | 98.2(98.0-98.3)  | 93.6(92.8-94.4)  |
| Ventricular septal defect (n=453)                                  | 6.2(4.1-8.8)     | 95.4(94.6-96.1) | 14.7(10.4-20.2) | 88.8(88.6-89.1)  | 85.3(84.1-86.4)  |
| Patent ductus arteriosus (n=534)                                   | 1.9(0.9-3.4)     | 94.8(94.0-95.5) | 5.2(2.9-9.4)    | 86.2(86.0-86.4)  | 82.3(81.1-83.5)  |
| Aortopulmonary window (n=10)                                       | 10.0(0.2-44.5)   | 95.2(94.5-95.9) | 0.5(0.1-3.3)    | 99.8(99.7-99.8)  | 95.0(94.3-95.7)  |
| Abnormal origin of coronary artery from inappropriate situs (n=14) | 7.1(0.2-33.9)    | 95.2(94.5-95.9) | 0.5(0.1-3.4)    | 99.7(99.6-99.7)  | 94.9(94.2-95.6)  |
| Anomalous left coronary artery from the pulmonary artery (n=2)     | -                | -               | -               | -                | -                |
| Anomalies of the aortic arch (n=61)                                | 4.9(1-13.7)      | 95.2(94.5-95.9) | 1.6(0.5-4.6)    | 98.5(98.4-98.6)  | 93.8(93-94.6)    |
| Aberrant origin of the subclavian artery (n=9)                     | -                | -               | -               | -                | -                |
| Partially anomalous pulmonary venous connection (n=2)              | 50.0(1.3-98.7)   | 95.2(94.3-95.9) | 0.5(0.1-2.1)    | 99.97(99.8-99.9) | 95.2(94.5-95.9)  |
| Totally anomalous pulmonary venous connection (n=19)               | 10.5(1.3-33.1)   | 95.2(94.5-95.9) | 1.0(0.3-3.8)    | 99.5(99.5-99.6)  | 94.8(94.1-95.5)  |
| Tricuspid valve atresia (n=22)                                     | -                | -               | -               | -                | -                |
| Tricuspid valve dysplasia (n=17)                                   | 11.8(1.5-36.4)   | 95.2(94.5-95.9) | 1.0(0.3-3.8)    | 99.6(99.5-99.7)  | 94.9(94.2-95.5)  |
| Ebstein anomaly (n=8)                                              | 37.5(8.5-75.5)   | 95.3(94.6-95.9) | 1.6(0.6-3.8)    | 99.9(99.8-99.9)  | 95.2(94.5-95.8)  |
| Tricuspid stenosis (n=1)                                           | 100.0(2.5-100.0) | 95.2(94.5-95.9) | 0.5(0.5-0.6)    | 100.0            | 95.2(94.5-95.9)  |
| Pulmonary stenosis (n=183)                                         | 4.9(2.3-9.1)     | 95.2(94.5-95.9) | 4.7(2.5-8.7)    | 95.4(95.3-95.6)  | 91.1(90.0-91.9)  |
| Pulmonary valve dysplasia (n=38)                                   | -                | -               | -               | -                | -                |
| Pulmonary atresia and intact ventriculum septum (n=33)             | -                | -               | -               | -                | -                |
| Pulmonary atresia and ventricular septal defect (n=22)             | 18.2(5.2-40.3)   | 95.3(94.6-95.9) | 2.1(0.9-5)      | 99.5(99.4-99.6)  | 94.9(94.1-95.5)  |
| Tetralogy of Fallot (n=157)                                        | 26.1(19.4-33.7)  | 96.1(95.4-96.7) | 21.5(16.8-27.1) | 96.9(96.7-97.2)  | 93.3(92.5-94.1)) |
| Truncus arteriosus (n=8)                                           | -                | -               | -               | -                | -                |
| Mitral valve abnormalities (n=53)                                  | 7.5(2.1-18.2)    | 95.2(94.5-95.9) | 2.1(0.8-5.2)    | 98.7(98.6-98.8)  | 94.0(93.3-94.8)  |
| Bicuspid aortic valve (n=33)                                       | 6.1(0.7-20.2)    | 95.5(94.8-96.1) | 1.0(0.3-3.9)    | 99.2(99.2-99.3)  | 94.7(94.0-95.4)  |
| Aortic valve stenosis (n=52)                                       | 1.9(0-10.3)      | 95.3(94.6-95.9) | 0.5(0.1-3.5)    | 98.7(98.6-98.7)  | 94.1(93.3-94.8)  |
| Aortic subvalvar stenosis (n=4)                                    | -                | -               | -               | -                | -                |
| Coartaction of the aorta (n=127)                                   | 11.8(6.8-18.7)   | 95.4(94.7-96.1) | 7.8(4.9-12.3)   | 97.0(96.9-97.2)  | 92.8(91.9-93.6)  |
| Hypoplastic left heart syndrome (n=17)                             | 5.9(0.1-28.7)    | 95.2(94.5-95.9) | 0.5(0.1-3.4)    | 99.6(99.5-99.6)  | 94.8(94.1-95.5)  |
| Transposition of the great arteries (n=64)                         | 9.4(3.5-19.3)    | 95.3(94.6-95.9) | 3.1(1.5-6.6)    | 98.5(98.3-98.6)  | 93.9(93.1-94.6)  |
| Congenitally corrected transposition of the great arteries (n=6)   | -                | -               | -               | -                | -                |

|                                                      |                |                 |                |                 |                 |
|------------------------------------------------------|----------------|-----------------|----------------|-----------------|-----------------|
| Double outlet right ventricle (n=44)                 | 15.9(6.6-30.1) | 95.3(94.6-96.0) | 3.7(1.9-7.1)   | 99.0(98.9-99.1) | 94.5(93.7-95.1) |
| Double inlet left ventricle (n=11)                   | 9.1(0.2-41.3)  | 95.2(94.5-95.9) | 0.5(0.1-3.3)   | 99.7(99.7-99.8) | 95.0(94.3-95.6) |
| Cor triatratum (n=3)                                 | -              | -               | -              | -               | -               |
| Abnormalities of atrial situs (n=16)                 | 6.2(0.2-30.2)  | 95.2(94.5-95.9) | 0.5(0.1-3.4)   | 99.6(99.5-99.6) | 94.9(94.1-95.5) |
| <i>Cardiomyopathies (n=65)</i>                       | -              | -               | -              | -               | -               |
| Hypertrophic cardiomyopathy (n=34)                   | -              | -               | -              | -               | -               |
| Dilated cardiomyopathy (n=28)                        | -              | -               | -              | -               | -               |
| Restrictive cardiomyopathy (n=1)                     | -              | -               | -              | -               | -               |
| Left ventricular non compaction (n=2)                | -              | -               | -              | -               | -               |
| <i>Rheumatic heart disease (n=11)</i>                | -              | -               | -              | -               | -               |
| <i>Myocarditis (n=50)</i>                            | -              | -               | -              | -               | -               |
| <i>Pericardial disease (n=71)</i>                    | 1.4(0.0-7.6)   | 95.2(94.4-95.8) | 0.5(0.1-3.6)   | 98.2(98.1-98.2) | 93.5(92.7-94.2) |
| Acute pericarditis (n=67)                            | 1.5(0.0-8.0)   | 95.2(94.4-95.8) | 0.5(0.1-3.6)   | 98.3(98.2-98.3) | 93.6(92.8-94.3) |
| Chronic pericarditis (n=4)                           | -              | -               | -              | -               | -               |
| <i>Kawasaki disease (n=8)</i>                        | -              | -               | -              | -               | -               |
| <i>Pulmonary hypertension (n=25)</i>                 | 4.0(0.1-20.3)  | 95.2(94.4-95.8) | 0.5(0.1-3.5)   | 99.4(99.3-99.4) | 94.6(93.8-95.3) |
| <i>Cardiac tumours (n=15)</i>                        | -              | -               | -              | -               | -               |
| Rhabdomyomas (n=15)                                  | -              | -               | -              | -               | -               |
| <i>Disorder of the cardiac rhythm (n=712)</i>        | 2.9(1.8-4.5)   | 94.8(94.0-95.5) | 11.0(7.3-16.2) | 81.8(81.6-82.0) | 78.4(77.1-79.7) |
| Frequent supraventricular premature complexes (n=48) | -              | -               | -              | -               | -               |
| Frequent ventricular premature complexes (n=78)      | 2.6(0.3-8.9)   | 95.2(94.4-95.8) | 1.0(0.3-4.0)   | 98.0(97.9-98.1) | 93.4(92.5-94.1) |
| Ventricular pre-excitation (n=130)                   | 1.5(0.2-5.4)   | 95.1(94.4-95.7) | 1.0(0.3-4.0)   | 96.6(96.6-96.7) | 92.0(91.2-92.9) |
| Atrial ectopic tachycardia (n=130)                   | 7.7(3.7-13.7)  | 95.3(94.6-95.9) | 5.2(2.9-9.2)   | 96.8(96.7-97.0) | 92.4(91.6-93.2) |
| Atrioventricular reentry tachycardia (n=237)         | 2.5(0.9-5.4)   | 95.1(94.3-95.7) | 3.1(1.4-6.7)   | 93.9(93.8-94.0) | 89.6(88.6-90.5) |
| Atrioventricular node reentry tachycardia (n=134)    | 4.5(1.7-9.5)   | 95.2(94.5-95.9) | 3.1(1.4-6.7)   | 96.6(96.5-96.7) | 92.2(91.3-93.0) |
| Atrial flutter (n=15)                                | -              | -               | -              | -               | -               |
| Atrial fibrillation (n=4)                            | -              | -               | -              | -               | -               |
| Ventricular tachycardia (n=7)                        | -              | -               | -              | -               | -               |
| <i>Cardiac channelopathies (n=47)</i>                | 2.1(0-11.1)    | 95.2(94.5-95.8) | 0.5(0.1-3.5)   | 98.8(98.7-98.8) | 94.1(93.3-94.8) |
| Long QT syndrome (n=27)                              | -              | -               | -              | -               | -               |
| Brugada syndrome (n=20)                              | 5.0(0.1-24.9)  | 95.2(94.5-95.9) | 0.5(0.1-3.4)   | 99.5(99.4-99.5) | 94.8(94.0-95.4) |
| <i>No morpho-functional abnormalities (n=620)</i>    | 4.0(2.6-5.9)   | 95.1(94.3-95.8) | 13.1(9.1-18.5) | 84.3(84.1-84.6) | 81.0(79.7-82.1) |

**Table S3.** Prevalence and diagnostic accuracy of complete left bundle branch block in paediatric heart disease.

|                                                                    | Sensitivity    | Specificity      | PPV            | NPV             | PA              |
|--------------------------------------------------------------------|----------------|------------------|----------------|-----------------|-----------------|
| <i>Congenital heart diseases (n=2369)</i>                          | 0.1(0.0-0.4)   | 100.0(99.8-100)  | 100.0          | 40.7            | 40.7(39.2-42.3) |
| Patent foramen ovale (n=109)                                       | -              | -                | -              | -               | -               |
| Secundum atrial septal defect (n=847)                              | 0.1(0.0-0.7)   | 99.9(99.8-100.0) | 33.3(4.3-84.6) | 78.8            | 78.8(77.5-80.0) |
| Primum atrial septal defect (n=11)                                 | -              | -                | -              | -               | -               |
| Atrioventricular septal defect (n=77)                              | -              | -                | -              | -               | -               |
| Ventricular septal defect (n=453)                                  | 0.2(0.0-1.2)   | 99.9(99.8-100.0) | 33.3(4.3-84.6) | 88.7(88.6-88.7) | 88.6(87.6-89.6) |
| Patent ductus arteriosus (n=534)                                   | -              | -                | -              | -               | -               |
| Aortopulmonary window (n=10)                                       | -              | -                | -              | -               | -               |
| Abnormal origin of coronary artery from inappropriate situs (n=14) | -              | -                | -              | -               | -               |
| Anomalous left coronary artery from the pulmonary artery (n=2)     | -              | -                | -              | -               | -               |
| Anomalies of the aortic arch (n=61)                                | -              | -                | -              | -               | -               |
| Aberrant origin of the subclavian artery (n=9)                     | -              | -                | -              | -               | -               |
| Partially anomalous pulmonary venous connection (n=2)              | -              | -                | -              | -               | -               |
| Totally anomalous pulmonary venous connection (n=19)               | -              | -                | -              | -               | -               |
| Tricuspid valve atresia (n=22)                                     | -              | -                | -              | -               | -               |
| Tricuspid valve dysplasia (n=17)                                   | -              | -                | -              | -               | -               |
| Ebstein anomaly (n=8)                                              | -              | -                | -              | -               | -               |
| Tricuspid stenosis (n=1)                                           | -              | -                | -              | -               | -               |
| Pulmonary stenosis (n=183)                                         | -              | -                | -              | -               | -               |
| Pulmonary valve dysplasia (n=38)                                   | -              | -                | -              | -               | -               |
| Pulmonary atresia and intact ventriculum septum (n=33)             | -              | -                | -              | -               | -               |
| Pulmonary atresia and ventricular septal defect (n=22)             | -              | -                | -              | -               | -               |
| Tetralogy of Fallot (n=157)                                        | -              | -                | -              | -               | -               |
| Truncus arteriosus (n=8)                                           | 12.5(0.3-52.6) | 99.9(99.8-100.0) | 33.3(4.8-83.3) | 99.8(99.8-99.9) | 99.8(99.6-99.9) |
| Mitral valve abnormalities (n=53)                                  | 1.9(0.0-10.1)  | 99.9(99.8-100.0) | 33.3(4.4-84.4) | 98.7(98.6-98.7) | 98.6(98.2-99.0) |
| Bicuspid aortic valve (n=33)                                       | -              | -                | -              | -               | -               |
| Aortic valve stenosis (n=52)                                       | 1.9(0.0-10.3)  | 99.9(99.8-100.0) | 33.3(4.4-84.4) | 98.7            | 98.7(98.3-99.0) |
| Aortic subvalvar stenosis (n=4)                                    | -              | -                | -              | -               | -               |
| Coartaction of the aorta (n=127)                                   | -              | -                | -              | -               | -               |
| Hypoplastic left heart syndrome (n=17)                             | -              | -                | -              | -               | -               |
| Transposition of the great arteries (n=64)                         | 1.6(0.0-8.4)   | 99.9(99.8-100.0) | 33.3(4.4-84.5) | 98.4(98.4-98.5) | 98.4(97.7-98.7) |
| Congenitally corrected transposition of the great arteries (n=6)   | -              | -                | -              | -               | -               |

|                                                      |   |   |   |   |   |
|------------------------------------------------------|---|---|---|---|---|
| Double outlet right ventricle (n=44)                 | - | - | - | - | - |
| Double inlet left ventricle (n=11)                   | - | - | - | - | - |
| Cor triatratum (n=3)                                 | - | - | - | - | - |
| Abnormalities of atrial situs (n=16)                 | - | - | - | - | - |
| <i>Cardiomyopathies (n=65)</i>                       | - | - | - | - | - |
| Hypertrophic cardiomyopathy (n=34)                   | - | - | - | - | - |
| Dilated cardiomyopathy (n=28)                        | - | - | - | - | - |
| Restrictive cardiomyopathy (n=1)                     | - | - | - | - | - |
| Left ventricular non compaction (n=2)                | - | - | - | - | - |
| <i>Rheumatic heart disease (n=11)</i>                | - | - | - | - | - |
| <i>Myocarditis (n=50)</i>                            | - | - | - | - | - |
| <i>Pericardial disease (n=71)</i>                    | - | - | - | - | - |
| Acute pericarditis (n=67)                            | - | - | - | - | - |
| Chronic pericarditis (n=4)                           | - | - | - | - | - |
| <i>Kawasaki disease (n=8)</i>                        | - | - | - | - | - |
| <i>Pulmonary hypertension (n=25)</i>                 | - | - | - | - | - |
| <i>Cardiac tumours (n=15)</i>                        | - | - | - | - | - |
| Rhabdomyomas (n=15)                                  | - | - | - | - | - |
| <i>Disorder of the cardiac rhythm (n=712)</i>        | - | - | - | - | - |
| Frequent supraventricular premature complexes (n=48) | - | - | - | - | - |
| Frequent ventricular premature complexes (n=78)      | - | - | - | - | - |
| Ventricular pre-excitation (n=130)                   | - | - | - | - | - |
| Atrial ectopic tachycardia (n=130)                   | - | - | - | - | - |
| Atrioventricular reentry tachycardia (n=237)         | - | - | - | - | - |
| Atrioventricular node reentry tachycardia (n=134)    | - | - | - | - | - |
| Atrial flutter (n=15)                                | - | - | - | - | - |
| Atrial fibrillation (n=4)                            | - | - | - | - | - |
| Ventricular tachycardia (n=7)                        | - | - | - | - | - |
| <i>Cardiac channelopathies (n=47)</i>                | - | - | - | - | - |
| Long QT syndrome (n=27)                              | - | - | - | - | - |
| Brugada syndrome (n=20)                              | - | - | - | - | - |
| <i>No morpho-functional abnormalities (n=620)</i>    | - | - | - | - | - |

**Table S4** Prevalence and diagnostic accuracy of left anterior fascicular block in paediatric heart disease.-

|                                                                    | Sensitivity   | Speci-ficity     | PPV             | NPV             | PA              |
|--------------------------------------------------------------------|---------------|------------------|-----------------|-----------------|-----------------|
| <i>Congenital heart diseases (n=2369)</i>                          | 0.2(0.1-0.5)  | 99.9(99.7-100.0) | 83.3(36.9-97.7) | 40.7(40.6-40.7) | 40.8(39.2-42.3) |
| Patent foramen ovale (n=109)                                       | -             | -                | -               | -               | -               |
| Secundum atrial septal defect (n=847)                              | 0.1(0.0-0.7)  | 99.8(99.6-99.9)  | 16.7(2.3-63.1)  | 78.8(78.7-78.8) | 78.7(77.4-79.9) |
| Primum atrial septal defect (n=11)                                 | -             | -                | -               | -               | -               |
| Atrioventricular septal defect (n=77)                              | 2.6(0.3-9.1)  | 99.9(99.8-100.0) | 33.3(98.0-98.2) | 98.1(98.0-98.2) | 98.0(97.5-98.4) |
| Ventricular septal defect (n=453)                                  | 0.2( 0.0-1.2) | 99.8(99.7-99.9)  | 16.7(2.363.1)   | 88.7(88.6-88.7) | 88.5(87.5-89.5) |
| Patent ductus arteriosus (n=534)                                   | -             | -                | -               | -               | -               |
| Aortopulmonary window (n=10)                                       | -             | -                | -               | -               | -               |
| Abnormal origin of coronary artery from inappropriate situs (n=14) | -             | -                | -               | -               | -               |
| Anomalous left coronary artery from the pulmonary artery (n=2)     | -             | -                | -               | -               | -               |
| Anomalies of the aortic arch (n=61)                                | -             | -                | -               | -               | -               |
| Aberrant origin of the subclavian artery (n=9)                     | -             | -                | -               | -               | -               |
| Partially anomalous pulmonary venous connection (n=2)              | -             | -                | -               | -               | -               |
| Totally anomalous pulmonary venous connection (n=19)               | -             | -                | -               | -               | -               |
| Tricuspid valve atresia (n=22)                                     | 4.5(0.1-22.9) | 99.9(99.7-100.0) | 16.7(2.4-62.2)  | 99.5(99.4-99.5) | 99.3(99.0-99.6) |
| Tricuspid valve dysplasia (n=17)                                   | -             | -                | -               | -               | -               |
| Ebstein anomaly (n=8)                                              | -             | -                | -               | -               | -               |
| Tricuspid stenosis (n=1)                                           | -             | -                | -               | -               | -               |
| Pulmonary stenosis (n=183)                                         | -             | -                | -               | -               | -               |
| Pulmonary valve dysplasia (n=38)                                   | -             | -                | -               | -               | -               |
| Pulmonary atresia and intact ventriculum septum (n=33)             | -             | -                | -               | -               | -               |
| Pulmonary atresia and ventricular septal defect (n=22)             | -             | -                | -               | -               | -               |
| Tetralogy of Fallot (n=157)                                        | 0.6(0.0-3.5)  | 99.9(99.7-99.9)  | 16.7(2.3-63.0)  | 96.1(96.0-96.1) | 96.0(95.3-96.6) |
| Truncus arteriosus (n=8)                                           | -             | -                | -               | -               | -               |
| Mitral valve abnormalities (n=53)                                  | -             | -                | -               | -               | -               |
| Bicuspid aortic valve (n=33)                                       | -             | -                | -               | -               | -               |
| Aortic valve stenosis (n=52)                                       | -             | -                | -               | -               | -               |
| Aortic subvalvar stenosis (n=4)                                    | -             | -                | -               | -               | -               |
| Coartaction of the aorta (n=127)                                   | -             | -                | -               | -               | -               |
| Hypoplastic left heart syndrome (n=17)                             | -             | -                | -               | -               | -               |
| Transposition of the great arteries (n=64)                         | 1.6(0.0-8.4)  | 99.9(99.7-100.0) | 16.7(2.3-62.8)  | 98.4(98.4-98.5) | 98.3(97.8-98.7) |
| Congenitally corrected transposition of the great arteries (n=6)   | -             | -                | -               | -               | -               |

|                                                      |              |                  |                |                 |                 |
|------------------------------------------------------|--------------|------------------|----------------|-----------------|-----------------|
| Double outlet right ventricle (n=44)                 | -            | -                | -              | -               | -               |
| Double inlet left ventricle (n=11)                   | -            | -                | -              | -               | -               |
| Cor triatratum (n=3)                                 | -            | -                | -              | -               | -               |
| Abnormalities of atrial situs (n=16)                 | -            | -                | -              | -               | -               |
| <i>Cardiomyopathies (n=65)</i>                       | -            | -                | -              | -               | -               |
| Hypertrophic cardiomyopathy (n=34)                   | -            | -                | -              | -               | -               |
| Dilated cardiomyopathy (n=28)                        | -            | -                | -              | -               | -               |
| Restrictive cardiomyopathy (n=1)                     | -            | -                | -              | -               | -               |
| Left ventricular non compaction (n=2)                | -            | -                | -              | -               | -               |
| <i>Rheumatic heart disease (n=11)</i>                | -            | -                | -              | -               | -               |
| <i>Myocarditis (n=50)</i>                            | -            | -                | -              | -               | -               |
| <i>Pericardial disease (n=71)</i>                    | -            | -                | -              | -               | -               |
| Acute pericarditis (n=67)                            | -            | -                | -              | -               | -               |
| Chronic pericarditis (n=4)                           | -            | -                | -              | -               | -               |
| <i>Kawasaki disease (n=8)</i>                        | -            | -                | -              | -               | -               |
| <i>Pulmonary hypertension (n=25)</i>                 | -            | -                | -              | -               | -               |
| <i>Cardiac tumours (n=15)</i>                        | -            | -                | -              | -               | -               |
| Rhabdomyomas (n=15)                                  | -            | -                | -              | -               | -               |
| <i>Disorder of the cardiac rhythm (n=712)</i>        | 0.1(0.0-0.8) | 99.8(99.6-99.9)  | 16.7(2.3-63.1) | 82.2(82.1-82.2) | 82.1(80.9-83.2) |
| Frequent supraventricular premature complexes (n=48) | -            | -                | -              | -               | -               |
| Frequent ventricular premature complexes (n=78)      | -            | -                | -              | -               | -               |
| Ventricular pre-excitation (n=130)                   | 0.8(0.0-4.2) | 99.9(99.7-100.0) | 16.7(2.3-63.0) | 96.8(96.7-96.8) | 96.6(96-97.2)   |
| Atrial ectopic tachycardia (n=130)                   | -            | -                | -              | -               | -               |
| Atrioventricular reentry tachycardia (n=237)         | -            | -                | -              | -               | -               |
| Atrioventricular node reentry tachycardia (n=134)    | -            | -                | -              | -               | -               |
| Atrial flutter (n=15)                                | -            | -                | -              | -               | -               |
| Atrial fibrillation (n=4)                            | -            | -                | -              | -               | -               |
| Ventricular tachycardia (n=7)                        | -            | -                | -              | -               | -               |
| <i>Cardiac channelopathies (n=47)</i>                | -            | -                | -              | -               | -               |
| Long QT syndrome (n=27)                              | -            | -                | -              | -               | -               |
| Brugada syndrome (n=20)                              | -            | -                | -              | -               | -               |
| <i>No morpho-functional abnormalities (n=620)</i>    | -            | -                | -              | -               | -               |



**Table S5.** Prevalence and diagnostic accuracy of complete right bundle branch block + left anterior fascicular block in paediatric heart disease.

|                                                                    | Sensitivity   | Specificity       | PPV             | NPV             | PA              |
|--------------------------------------------------------------------|---------------|-------------------|-----------------|-----------------|-----------------|
| <i>Congenital heart diseases (n=2369)</i>                          | 0.2(0.1-0.5)  | 100.0(99.8-100.0) | 100.0           | 40.7(40.7-40.8) | 40.8(39.3-42.4) |
| Patent foramen ovale (n=109)                                       | -             | -                 | -               | -               | -               |
| Secundum atrial septal defect (n=847)                              | -             | -                 | -               | -               | -               |
| Primum atrial septal defect (n=11)                                 | -             | -                 | -               | -               | -               |
| Atrioventricular septal defect (n=77)                              | 6.5(2.1-14.5) | 99.97(99.7-100.0) | 83.3(22.8-77.2) | 98.2(98.1-98.3) | 98.2(97.6-98.5) |
| Ventricular septal defect (n=453)                                  | -             | -                 | -               | -               | -               |
| Patent ductus arteriosus (n=534)                                   | -             | -                 | -               | -               | -               |
| Aortopulmonary window (n=10)                                       | -             | -                 | -               | -               | -               |
| Abnormal origin of coronary artery from inappropriate situs (n=14) | -             | -                 | -               | -               | -               |
| Anomalous left coronary artery from the pulmonary artery (n=2)     | -             | -                 | -               | -               | -               |
| Anomalies of the aortic arch (n=61)                                | -             | -                 | -               | -               | -               |
| Aberrant origin of the subclavian artery (n=9)                     | -             | -                 | -               | -               | -               |
| Partially anomalous pulmonary venous connection (n=2)              | -             | -                 | -               | -               | -               |
| Totally anomalous pulmonary venous connection (n=19)               | -             | -                 | -               | -               | -               |
| Tricuspid valve atresia (n=22)                                     | -             | -                 | -               | -               | -               |
| Tricuspid valve dysplasia (n=17)                                   | -             | -                 | -               | -               | -               |
| Ebstein anomaly (n=8)                                              | -             | -                 | -               | -               | -               |
| Tricuspid stenosis (n=1)                                           | -             | -                 | -               | -               | -               |
| Pulmonary stenosis (n=183)                                         | -             | -                 | -               | -               | -               |
| Pulmonary valve dysplasia (n=38)                                   | -             | -                 | -               | -               | -               |
| Pulmonary atresia and intact ventriculum septum (n=33)             | -             | -                 | -               | -               | -               |
| Pulmonary atresia and ventricular septal defect (n=22)             | -             | -                 | -               | -               | -               |
| Tetralogy of Fallot (n=157)                                        | -             | -                 | -               | -               | -               |
| Truncus arteriosus (n=8)                                           | -             | -                 | -               | -               | -               |
| Mitral valve abnormalities (n=53)                                  | -             | -                 | -               | -               | -               |
| Bicuspid aortic valve (n=33)                                       | -             | -                 | -               | -               | -               |
| Aortic valve stenosis (n=52)                                       | -             | -                 | -               | -               | -               |
| Aortic subvalvar stenosis (n=4)                                    | -             | -                 | -               | -               | -               |
| Coartaction of the aorta (n=127)                                   | -             | -                 | -               | -               | -               |
| Hypoplastic left heart syndrome (n=17)                             | -             | -                 | -               | -               | -               |
| Transposition of the great arteries (n=64)                         | -             | -                 | -               | -               | -               |
| Congenitally corrected transposition of the great arteries (n=6)   | -             | -                 | -               | -               | -               |

|                                                      |               |                  |                |                 |                 |
|------------------------------------------------------|---------------|------------------|----------------|-----------------|-----------------|
| Double outlet right ventricle (n=44)                 | 2.3(0.0-12.0) | 99.9(99.7-100.0) | 16.7(2.3-99.0) | 98.9(98.9-99.0) | 98.8(98.4-99.1) |
| Double inlet left ventricle (n=11)                   | -             | -                | -              | -               | -               |
| Cor triatratum (n=3)                                 | -             | -                | -              | -               | -               |
| Abnormalities of atrial situs (n=16)                 | -             | -                | -              | -               | -               |
| <i>Cardiomyopathies (n=65)</i>                       | -             | -                | -              | -               | -               |
| Hypertrophic cardiomyopathy (n=34)                   | -             | -                | -              | -               | -               |
| Dilated cardiomyopathy (n=28)                        | -             | -                | -              | -               | -               |
| Restrictive cardiomyopathy (n=1)                     | -             | -                | -              | -               | -               |
| Left ventricular non compaction (n=2)                | -             | -                | -              | -               | -               |
| <i>Rheumatic heart disease (n=11)</i>                | -             | -                | -              | -               | -               |
| <i>Myocarditis (n=50)</i>                            | -             | -                | -              | -               | -               |
| <i>Pericardial disease (n=71)</i>                    | -             | -                | -              | -               | -               |
| Acute pericarditis (n=67)                            | -             | -                | -              | -               | -               |
| Chronic pericarditis (n=4)                           | -             | -                | -              | -               | -               |
| <i>Kawasaki disease (n=8)</i>                        | -             | -                | -              | -               | -               |
| <i>Pulmonary hypertension (n=25)</i>                 | -             | -                | -              | -               | -               |
| <i>Cardiac tumours (n=15)</i>                        | -             | -                | -              | -               | -               |
| Rhabdomyomas (n=15)                                  | -             | -                | -              | -               | -               |
| <i>Disorder of the cardiac rhythm (n=712)</i>        | -             | -                | -              | -               | -               |
| Frequent supraventricular premature complexes (n=48) | -             | -                | -              | -               | -               |
| Frequent ventricular premature complexes (n=78)      | -             | -                | -              | -               | -               |
| Ventricular pre-excitation (n=130)                   | -             | -                | -              | -               | -               |
| Atrial ectopic tachycardia (n=130)                   | -             | -                | -              | -               | -               |
| Atrioventricular reentry tachycardia (n=237)         | -             | -                | -              | -               | -               |
| Atrioventricular node reentry tachycardia (n=134)    | -             | -                | -              | -               | -               |
| Atrial flutter (n=15)                                | -             | -                | -              | -               | -               |
| Atrial fibrillation (n=4)                            | -             | -                | -              | -               | -               |
| Ventricular tachycardia (n=7)                        | -             | -                | -              | -               | -               |
| <i>Cardiac channelopathies (n=47)</i>                | -             | -                | -              | -               | -               |
| Long QT syndrome (n=27)                              | -             | -                | -              | -               | -               |
| Brugada syndrome (n=20)                              | -             | -                | -              | -               | -               |
| <i>No morpho-functional abnormalities (n=620)</i>    |               |                  | -              |                 |                 |
